# Supplementary material
Source: Research Square preprint supplement (doi:10.21203/rs.3.rs-8829255/v1)
Supplement: Supplementary file 1 [file 479f7bd11ba8234935a772f8.pdf]

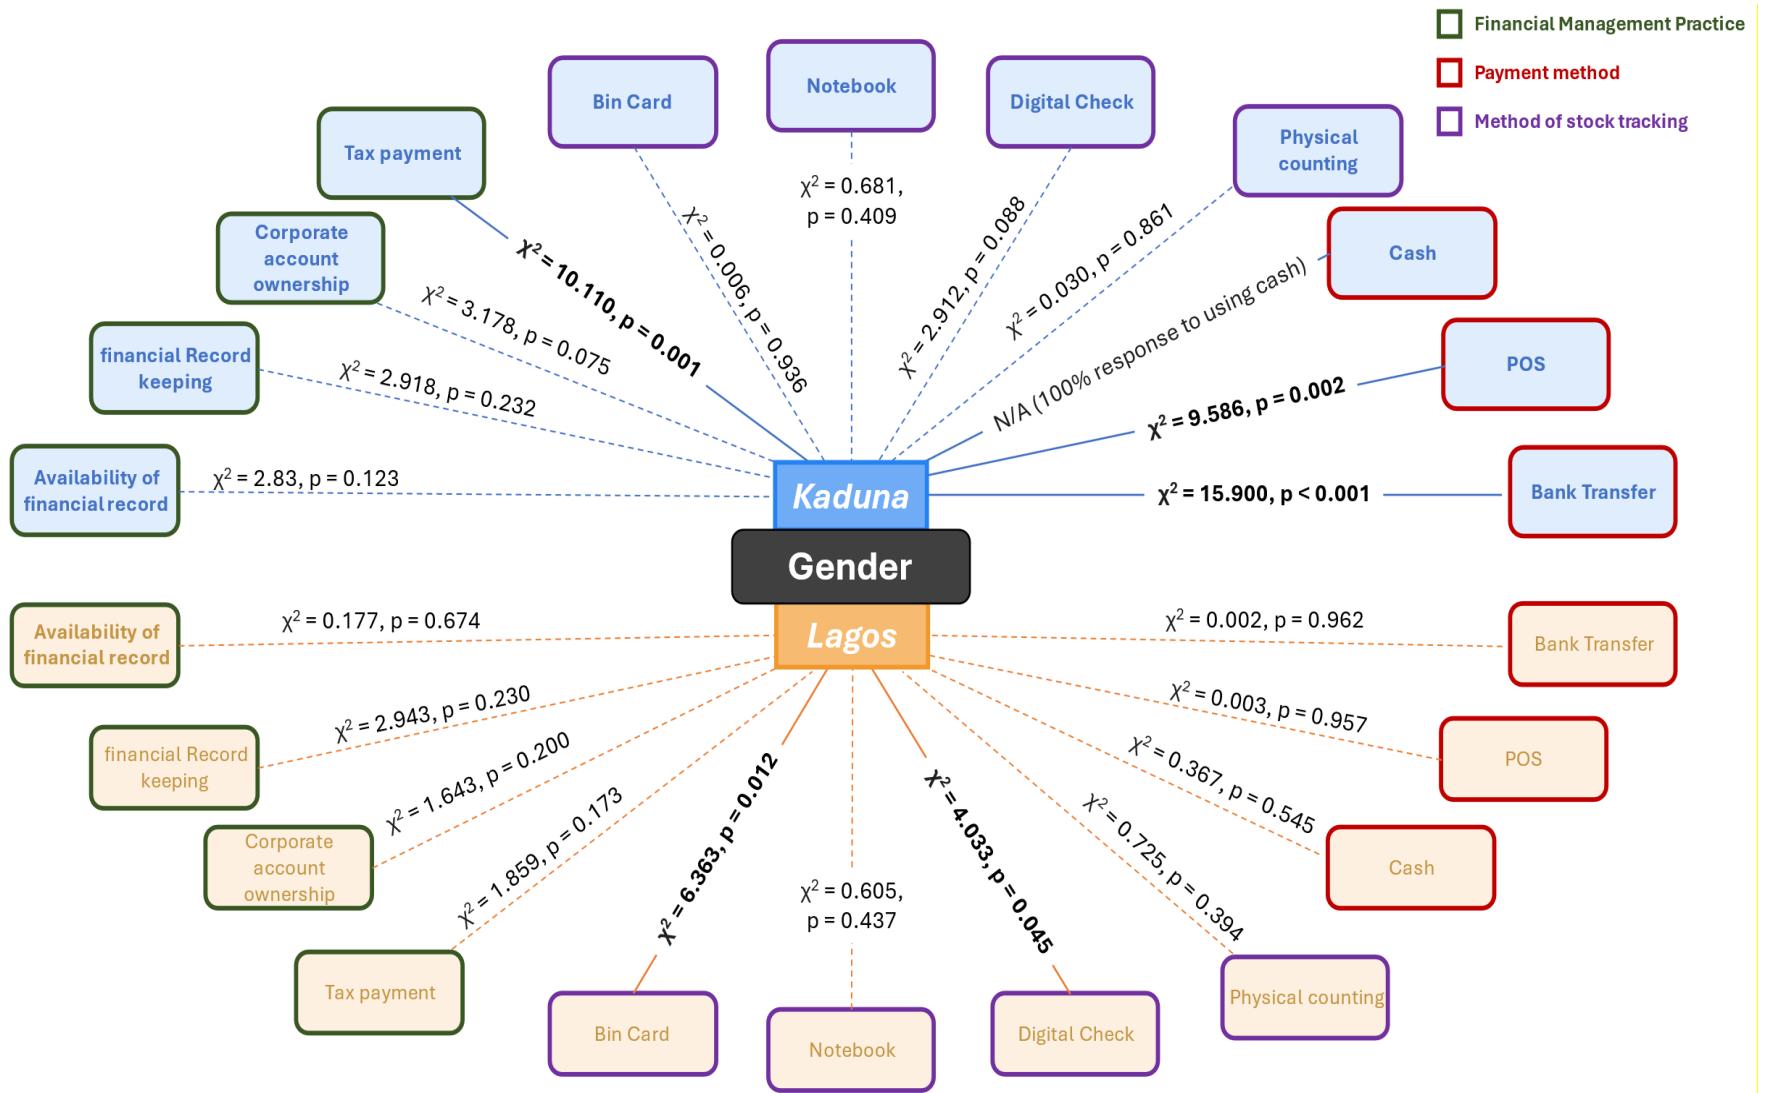

**Figure 2:** Show association between gender and various financial management/operational practices across states

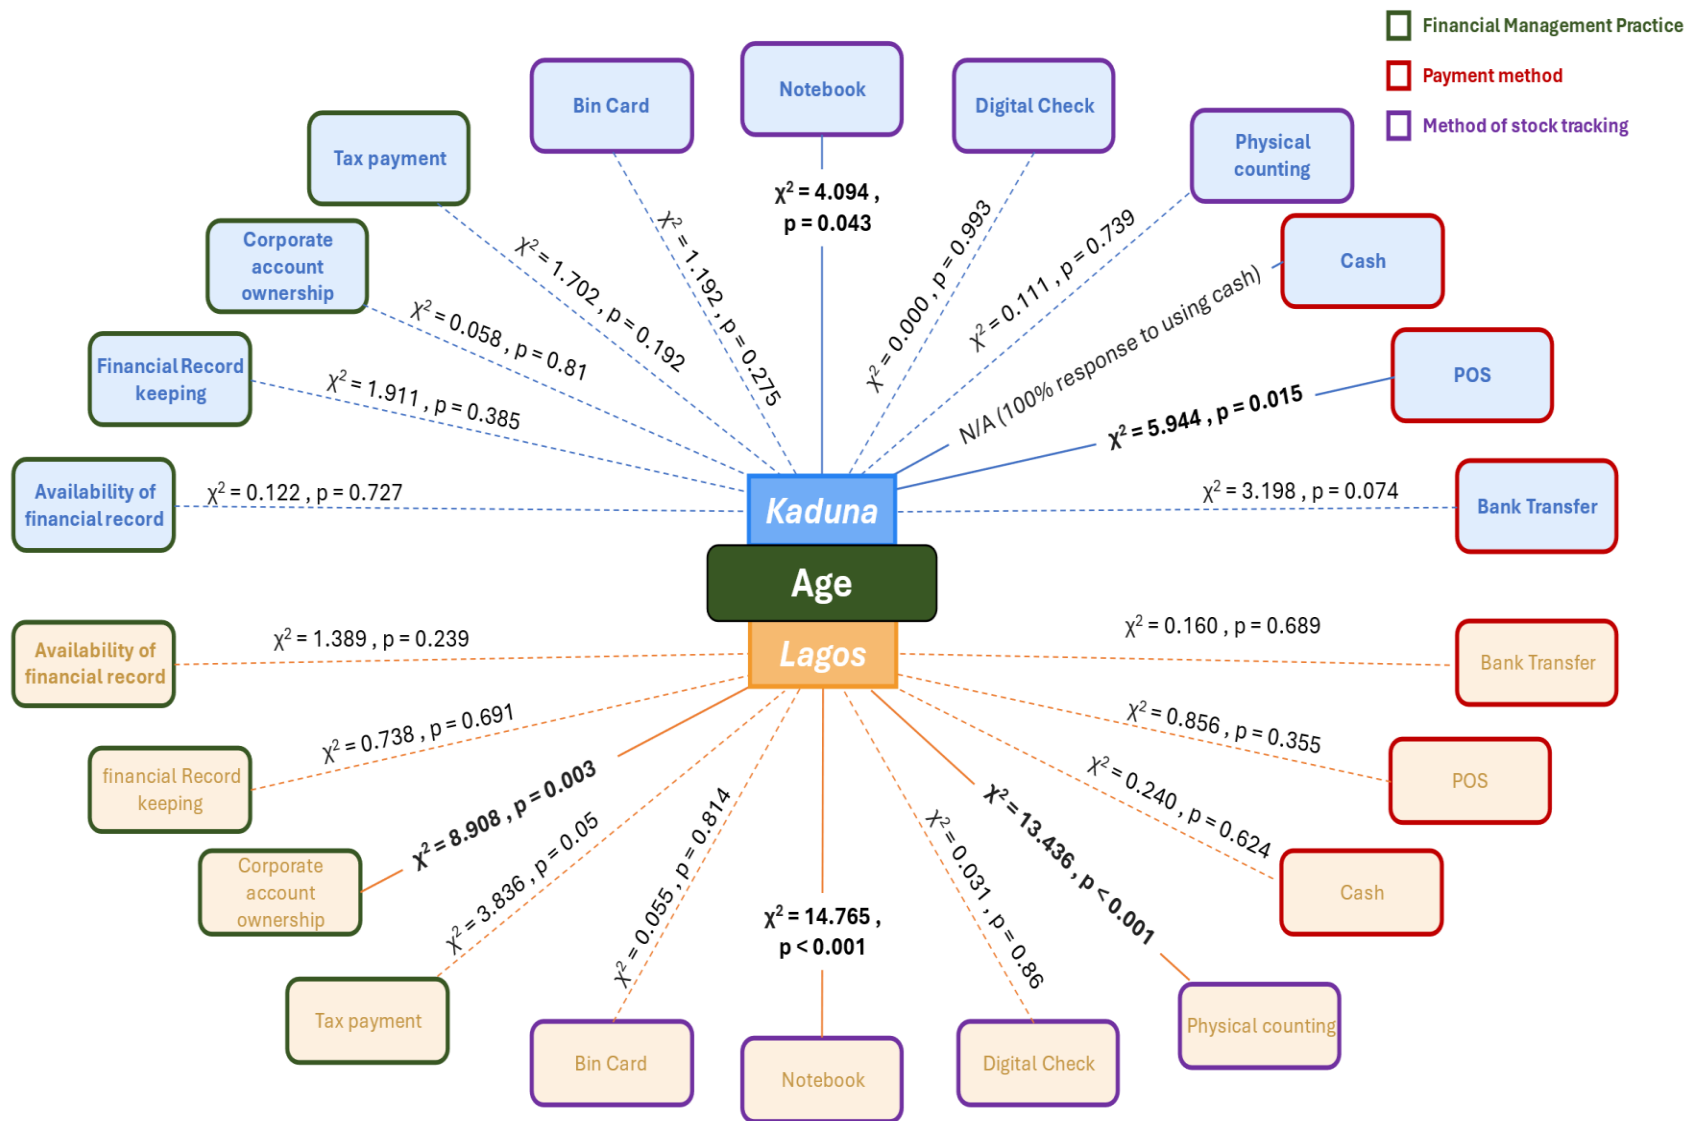

**Figure 3:** Show association between Age and various financial management/operational practices across states

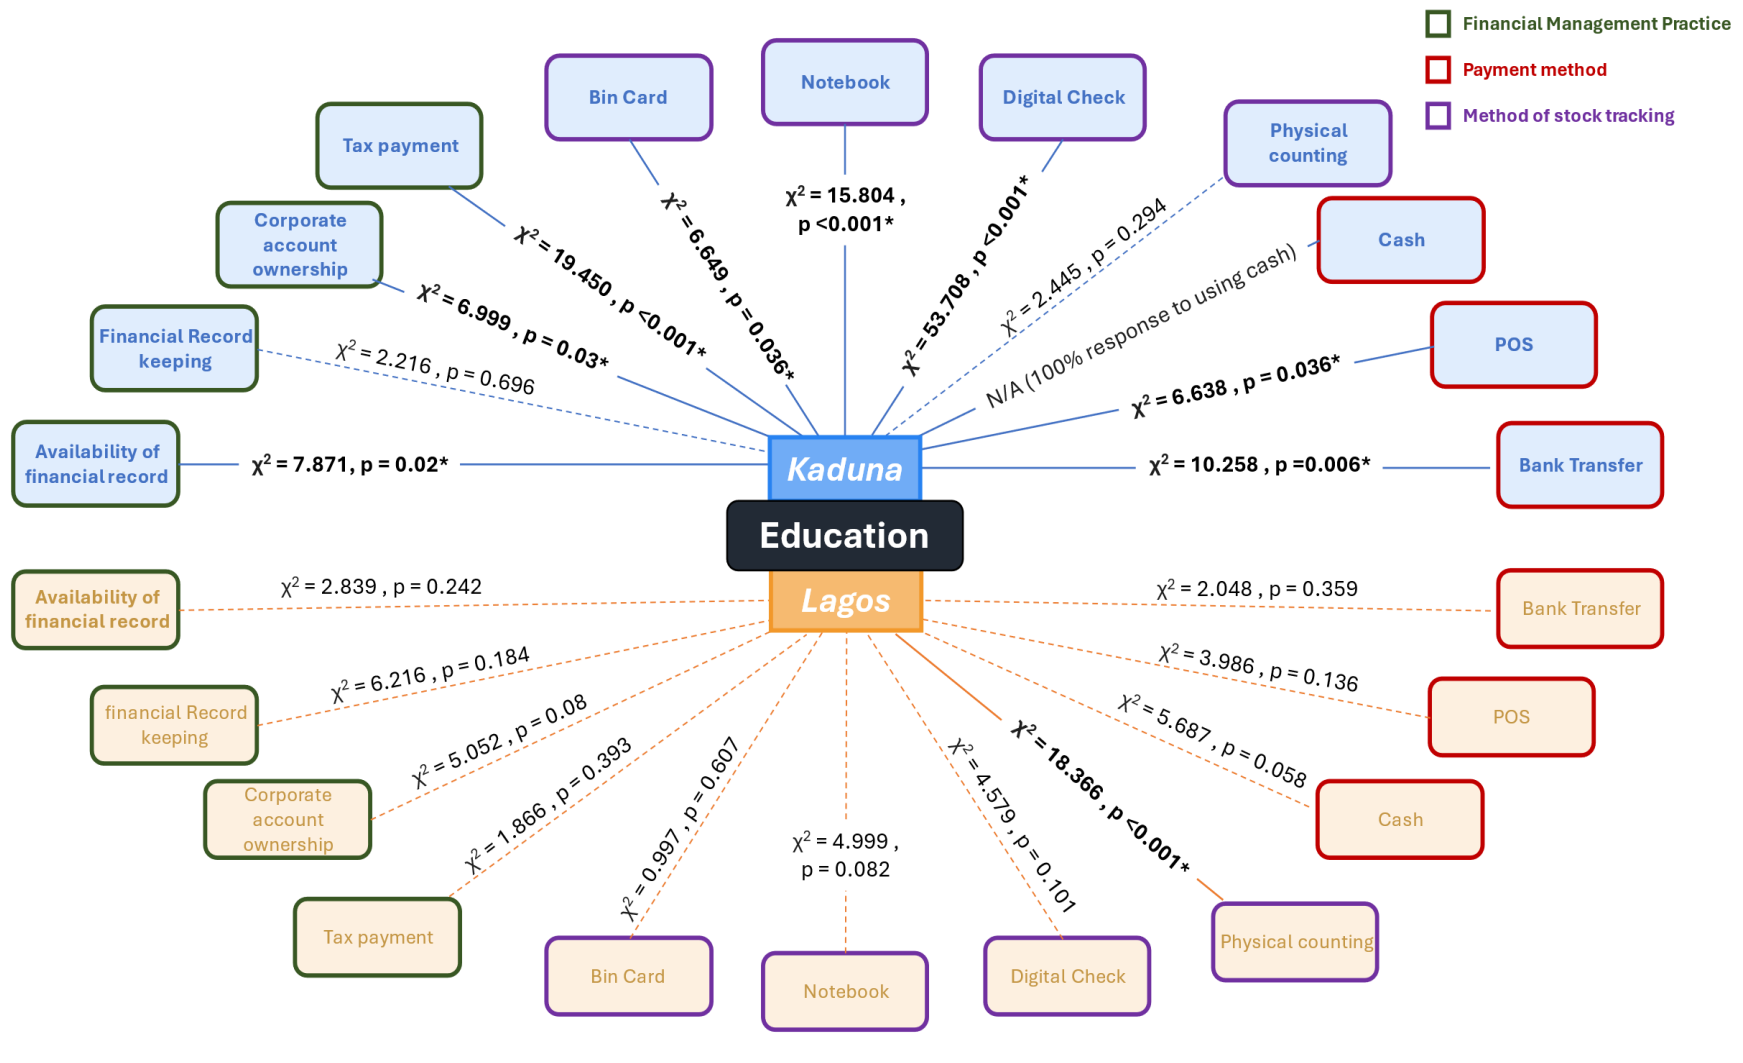

**Figure 4:** Show association between Education and various financial management/operational practices across states

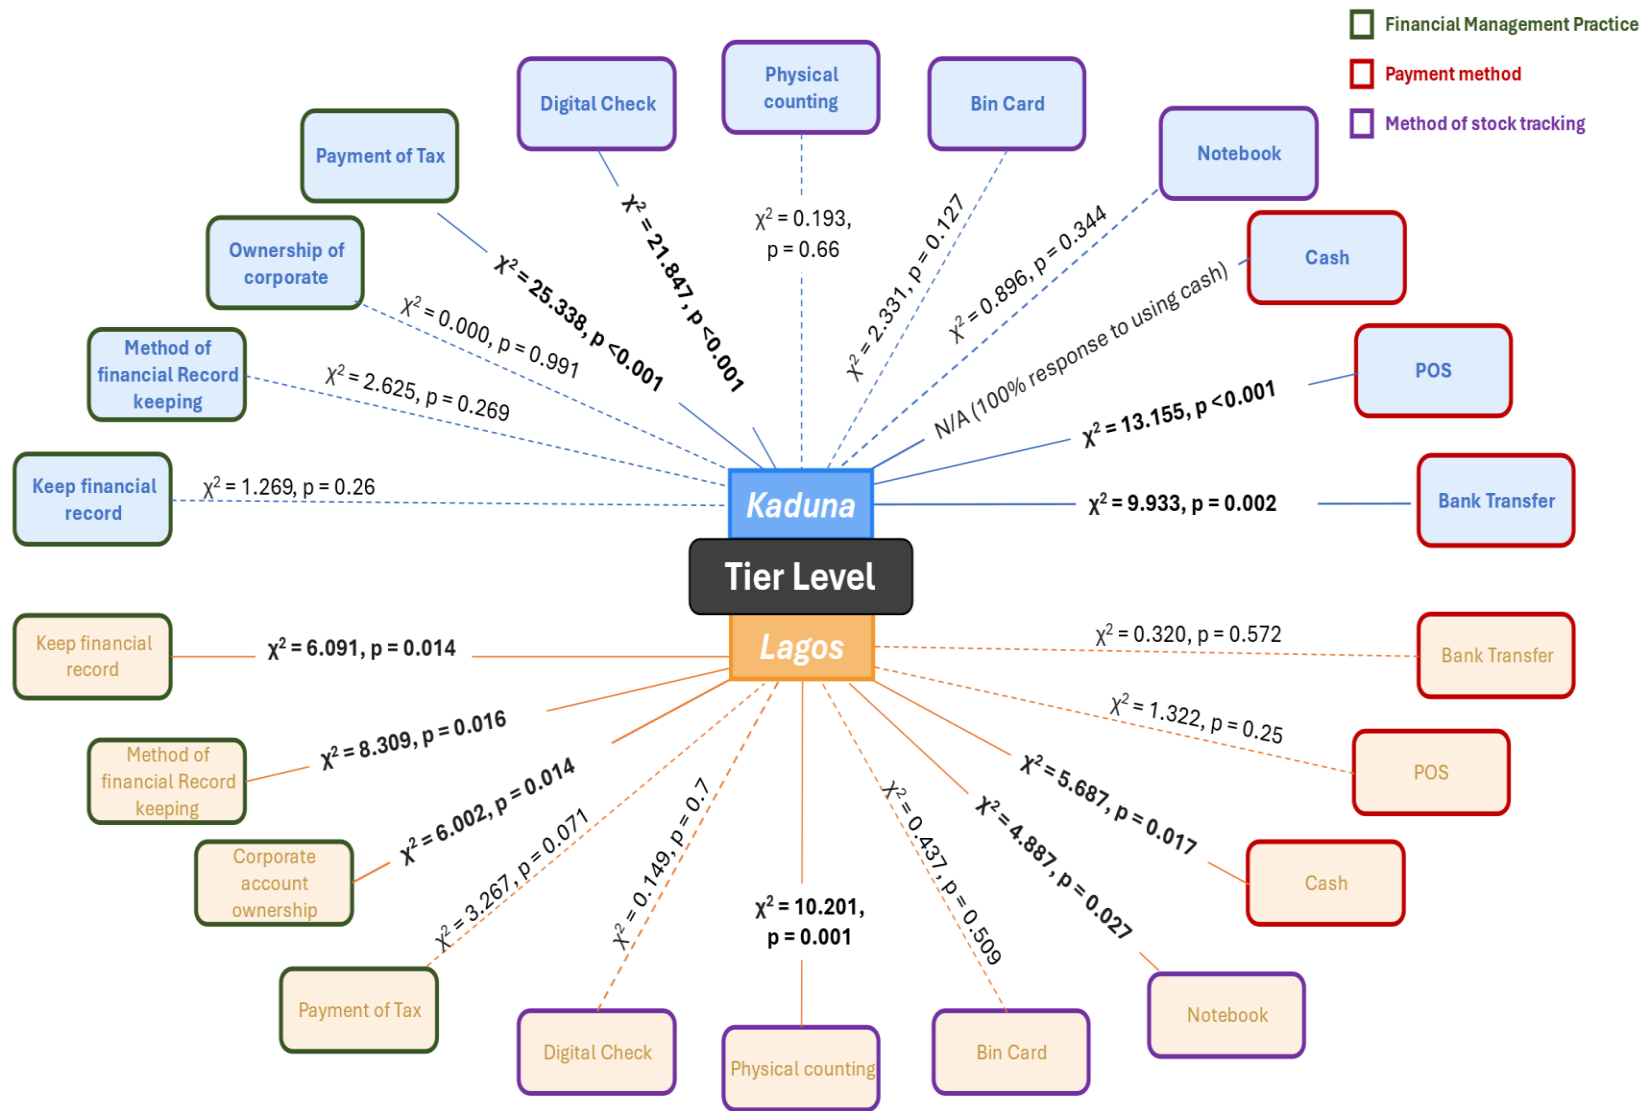

**Figure 5:** Show association between Tier and various financial management/operational practices across states
