# Supplementary material
Source: Research Square preprint supplement (doi:10.21203/rs.3.rs-8829255/v1)
Supplement: Supplementary file 4 [file bcf1fe968429636edf197190.docx]

**Table 5: Distribution of Access to Loan variables (both states)**

| **Variables** | **Category** | **N (%)** |
| --- | --- | --- |
| Awareness of loan products by PPVs | Yes | 127 (13.89%) |
| No | 787 (86.11%) |
| **Type of loans applied** | | |
| Working capital loans | No | 822 (89.93%) |
| Yes | 92 (10.07%) |
| Equipment financing | No | 887 (97.05%) |
| Yes | 27 (2.95%) |
| Equity financing | No | 906 (99.12%) |
| Yes | 8 (0.88%) |
| Start-up | No | 906 (99.12%) |
| Yes | 8 (0.88%) |
| Others | No | 1,002 (55.34%) |
| Yes | 809 (44.66%) |
| Successful loan application | Yes | 87 (67.97%) |
| No | 41 (32.03%) |

**Table 6: Association between financial management practices and access to loan**

| **Variables** | **Category** | **Did you successfully get the loan?** | | **Chi-Square** | **p-value** |
| --- | --- | --- | --- | --- | --- |
| **Yes** | **No** |
| Keep financial record | Yes | 35 (70%) | 15 (30%) | 0.155 | 0.693 |
| No | 52 (66.7%) | 26 (33.3%) |
| Method of financial keeping | Paper-based | 31 (68.9%) | 14 (31.1%) | 0.503 | 0.778 |
| Both | 3 (75%) | 1 (25%) |
| Digital Systems | 1 (100%) | 0 (0%) |
| Ownership of corporate bank account | Yes | 25 (64.1%) | 14 (35.9%) | 0.385 | 0.535 |
| No | 62 (69.7%) | 27 (30.3%) |
| Payment of taxes | Yes | 75 (72.1%) | 29 (27.9%) | 4.381 | **0.036*** |
| No | 12 (50%) | 12 (50%) |

Bold with * indicate statistical significance at p < 0.05

**Table 7: Logistic regression showing financial management practice predictors of access to loan**

| **Variable** | **Category** | **Beta** | **AOR (95% CI)** | **p-value** |
| --- | --- | --- | --- | --- |
| Keep financial record | Yes (ref) | 1.217 | [0.546,2.711] | 0.631 |
| No |
| Ownership of corporate bank account | Yes (ref) | 0.786 | [0.342,1.805] | 0.570 |
| No |
| Payment of business tax | Yes (ref) | 2.533 | [1.019,6.3] | **0.045*** |
| No |

Bold with * indicate statistical significance at p < 0.05
